# Supplementary material for: A strontium ferrite modified separator for adsorption and catalytic conversion of polysulfides for excellent lithium–sulfur batteries
Source: Royal Society of Chemistry journal article supplement (doi:10.1039/d3dt01126g), 2023-01-01
Supplement: d3dt01126g1.pdf [file d3dt01126g1.pdf]

## Supporting Information

Strontium ferrite modified separator for adsorption and catalytic  
conversion of polysulfides for excellent lithium-sulfur batteries

*Zhuoying Su<sup>1</sup>, Wenjuan Qiu<sup>1</sup>, Yuming He<sup>1</sup>, Ying Zeng<sup>1</sup>, Dongming Xie<sup>1</sup>, Xin Xiao<sup>1</sup>,*

*Junmin Nan<sup>1</sup>\*, Xiaoxi Zuo<sup>1</sup>\**

1. School of Chemistry, South China Normal University, Guangzhou 510006, P.

R. China

Corresponding author:

E-mail addresses: zuoxiaoxi75@163.com (X. Zuo), jmnan@scnu.edu.cn (J. Nan).

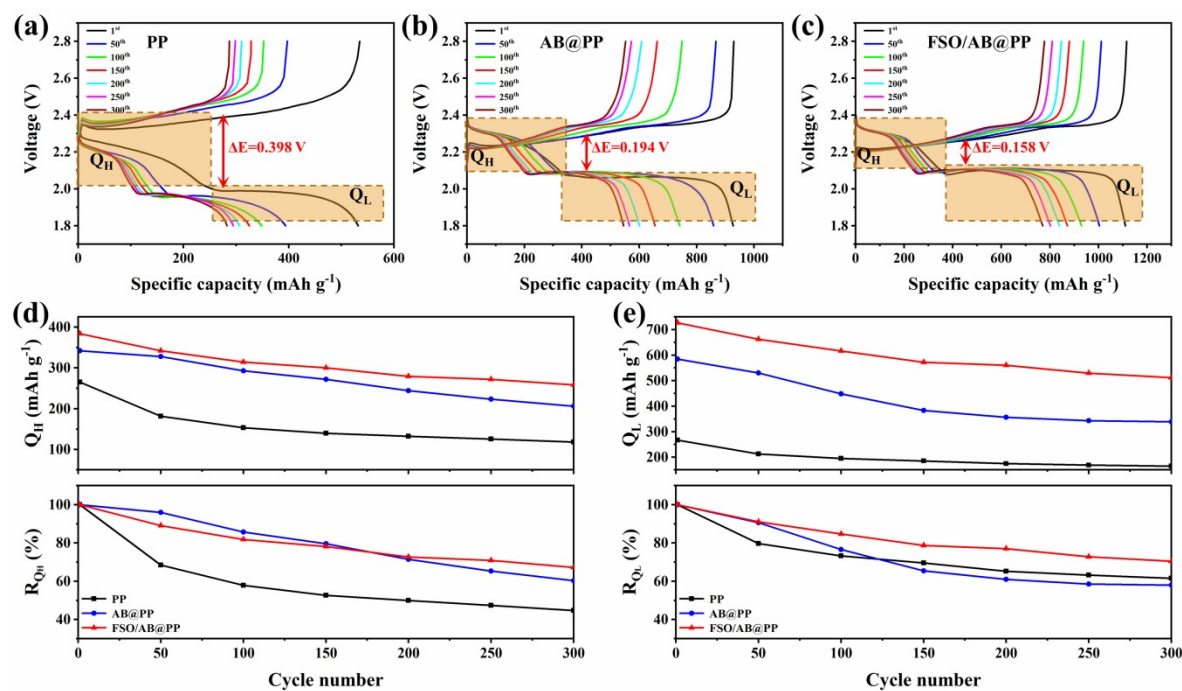

**Figure S1.** The charge-discharge curves of the cells were assembled with (a) PP, (b) AB@PP and (c) FSO/AB@PP separators at 0.5 C. (d) The capacity decay and capacity retention of the upper discharge platforms ( $Q_H$  and  $R_{QH}$ , respectively) and (e) the lower discharge platforms ( $Q_L$  and  $R_{QL}$ , respectively) with different separators.

In Figure S1d, the cell using PP separator shows a low  $Q_H$  value (265 mAh g<sup>-1</sup>) with a retention rate ( $R_{QH}$ ) of 44.7% after 300 cycles, which means the severe capacity fading. Although the cell using the AB@PP separator has a higher  $Q_H$  value of 342 mAh g<sup>-1</sup>, it retains only 60.3% capacity after 300 cycles. On the contrary, the cell with FSO/AB@PP separator displays the  $Q_H$  of 384 mA h g<sup>-1</sup> and 67.3% retention after 300 cycles. These results clearly indicate that the FSO/AB@PP separator effectively suppresses the shuttle behavior of LiPSs, which is more pronounced in the low platform region. From Figure S1e, the  $R_{QL}$  value of AB@PP separator reaches up

to 90.7% at 50 cycles, but the capacity loss of the cell is serious as the cycle progresses, and the  $R_{QL}$  value after 300 cycles is even lower than that of PP separator. On the contrary, FSO/AB@PP separator maintains the highest  $R_{QL}$  of 70.4% after 300 cycles. Compared with the rapid capacity decay of PP and AB@PP separators, there is no significant capacity loss of FSO/AB@PP separator, elucidating that the FSO/AB@PP separator not only successfully restrains the diffusion of LiPSs, but also guarantees the high activity and adequate reaction in terms of insoluble  $\text{Li}_2\text{S}/\text{Li}_2\text{S}_2$ .

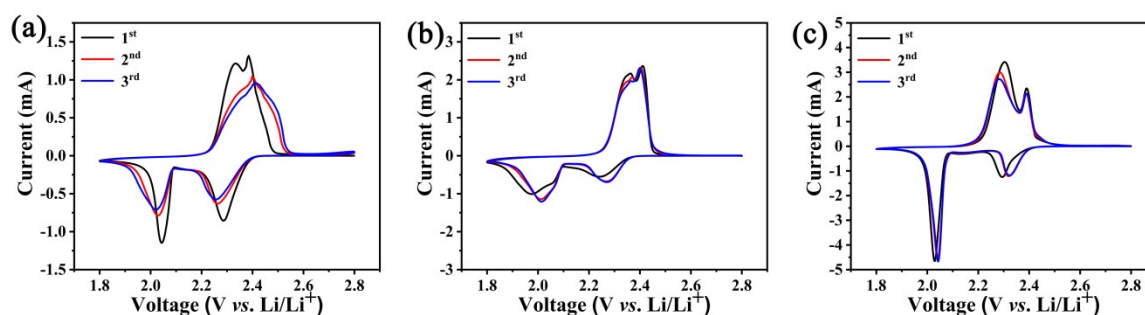

**Figure S2.** CV curves of the cells with (a) PP, (b) AB@PP and (c) FSO/AB@PP separators.

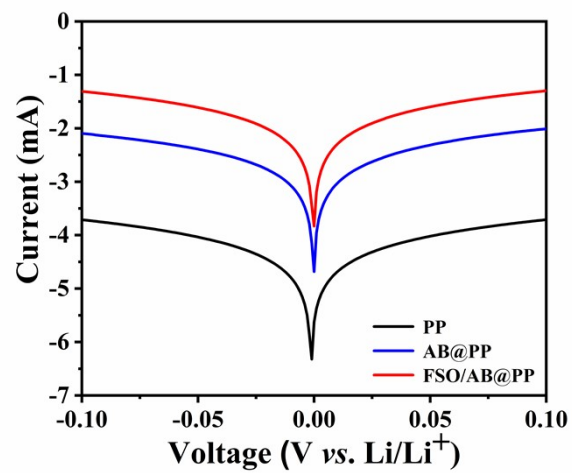

**Figure S3.** Tafel plots of the cells with different separators.

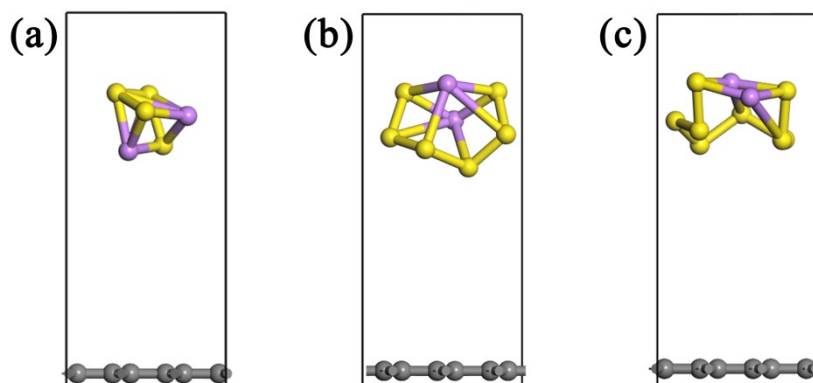

**Figure S4.** Optimized geometries of AB with (a)  $\text{Li}_2\text{S}_4$ , (b)  $\text{Li}_2\text{S}_6$ , and (c)  $\text{Li}_2\text{S}_8$ .

**Table S1.** List of  $R_s$ ,  $R_{ct}$  and  $R_{surf}$  of cells with different separators before and after cycling.

| Sample    | Before cycling     |                         |                       | After 50 cycles    |                         |                       |
|-----------|--------------------|-------------------------|-----------------------|--------------------|-------------------------|-----------------------|
|           | $R_s$ ( $\Omega$ ) | $R_{surf}$ ( $\Omega$ ) | $R_{ct}$ ( $\Omega$ ) | $R_s$ ( $\Omega$ ) | $R_{surf}$ ( $\Omega$ ) | $R_{ct}$ ( $\Omega$ ) |
| PP        | 1.516              | 3.148                   | 33.30                 | 2.836              | 15.96                   | 15.65                 |
| AB@PP     | 1.864              | 3.206                   | 29.51                 | 2.350              | 3.590                   | 4.830                 |
| FSO/AB@PP | 1.919              | 0.952                   | 9.496                 | 2.214              | 2.547                   | 2.769                 |

**Table S2.**  $\text{Li}^+$  diffusion coefficient values of the cells with different separators.

| Sample    | $\text{Li}^+$ diffusion coefficient ( $D_{\text{Li}^+}$ ) ( $\text{cm}^2 \text{ s}^{-1}$ ) |                       |                       |
|-----------|--------------------------------------------------------------------------------------------|-----------------------|-----------------------|
|           | A (cathodic peak)                                                                          | B (cathodic peak)     | C (anodic peak)       |
| PP        | $1.54 \times 10^{-8}$                                                                      | $7.26 \times 10^{-9}$ | $5.64 \times 10^{-9}$ |
| AB@PP     | $5.29 \times 10^{-8}$                                                                      | $1.08 \times 10^{-8}$ | $1.65 \times 10^{-8}$ |
| FSO/AB@PP | $3.13 \times 10^{-7}$                                                                      | $2.51 \times 10^{-7}$ | $6.59 \times 10^{-8}$ |
